# Supplementary material for: Theoretical screening of promising donor and π-linker groups for POM-based Zn–porphyrin dyes in dye-sensitized solar cells
Source: Royal Society of Chemistry journal article supplement (doi:10.1039/c8cp07333c), 2019-01-01
Supplement: c8cp07333c1.pdf [file c8cp07333c1.pdf]

## Supporting Information

### Theoretical screening promising donor and $\pi$ -linker groups for POM-based Zn-porphyrin dyes in dye-sensitized solar cells

Yu Gao <sup>a</sup>, Wei Guan <sup>a</sup>, Likai Yan <sup>a,\*</sup>, Yanhong Xu <sup>b,\*</sup>

<sup>a</sup> Institute of Functional Material Chemistry, National & Local United Engineering Lab for Power Battery, Key Laboratory of Polyoxometalate Science of Ministry of Education, Faculty of Chemistry, Northeast Normal University, Changchun 130024, P. R. China, Fax: +86-431-5684009.

<sup>b</sup> Key Laboratory of Preparation and Applications of Environmental Friendly Materials, Jilin Normal University, Ministry of Education, Changchun 130103, Jilin, China.

\* Corresponding author, E-mail address: yanlk924@nenu.edu.cn (L. K. Yan), xuyh@jlnu.edu.cn (Y. H. Xu).

### 1.1 Details about the average dye electrostatic potential ( $V_{EL}$ )

The average dye electrostatic potential on the  $TiO_2$  surface was evaluated by the following [1]:

$$V_{EL} = \frac{1}{n_{Ti}} \sum_{i=1}^{n_{Ti}} \sum_{j=1}^{n_q} \frac{q_j}{r_{ij}} \quad (1)$$

where  $q_j$  is the  $j_{th}$  of the  $n_q$  dye point charge calculated by Merz-Kollman method [2,3] to obtain the atomic charge distributions. And  $r_{ij}$  represents the distances between these of charges and each of the titanium atoms in the superficial layer of  $TiO_2$  cluster.

### 1.2 Details about the number of electron transferred from dyes to $TiO_2$ ( $n_{CT}$ )

Three terms were defined in the CDA theory based on the fragment orbitals (FO) as follows:

$$d_i = \sum_{m \in A} \sum_{n \in B}^{occ} \sum_{vir} \eta_i C_{m,i} C_{n,i} S_{m,n} \quad (2)$$

$$b_i = \sum_{m \in A} \sum_{n \in B}^{vir} \sum_{occ} \eta_i C_{m,i} C_{n,i} S_{m,n} \quad (3)$$

$$r_i = \sum_{m \in A} \sum_{n \in B}^{occ} \sum_{occ} \eta_i C_{m,i} C_{n,i} S_{m,n} \quad (4)$$

where *vir* and *occ* represent virtual and occupied orbitals,  $d_i$  is the number of electrons donated from A to B, and  $b_i$  is the electron numbers back donated from B to A;  $r_i$  is the close-shell interaction between two occupied FOs in A and B;  $i$  and  $\eta$  are index and occupation number of MO of complex, respectively;  $S_{m,n} = \int \varphi_m(r) \varphi_n(r) dr$  is the overlap integral between FO  $m$  and FO  $n$ ;  $C_{m,i}$  is the coefficient of FO  $m$  in MO  $i$  of complex; and  $C_{n,i}$  is the coefficient of FO  $n$  in MO  $i$  of complex. Here FO is the fragment orbital, and MO is the molecular orbital of the fragment in its isolated state.

## References

- [1] Ronca, E., Pastore, M., Belpassi, L., Tarantelli, F., Angelis, F. D. Influence of the dye molecular structure on the TiO<sub>2</sub> conduction band in dye-sensitized solar cells: disentangling charge transfer and electrostatic effects. *Energy Environ. Sci.* **2013**, *6*, 183–193.
- [2] Singh, U. C., Kollman, P. A. An approach to computing electrostatic charges for molecules. *J. Comput. Chem.* **1984**, *5*, 129–145.
- [3] Besler, B. H., Merz, K. M., Kollman, P. A. Atomic charges derived from semiempirical methods. *J. Comput. Chem.* **1990**, *11*, 431–439.

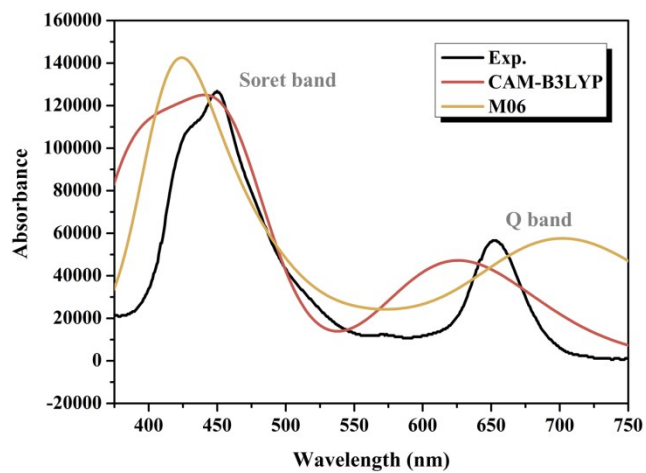

**Figure S1.** The experimental and theoretical absorption spectra of SM315.

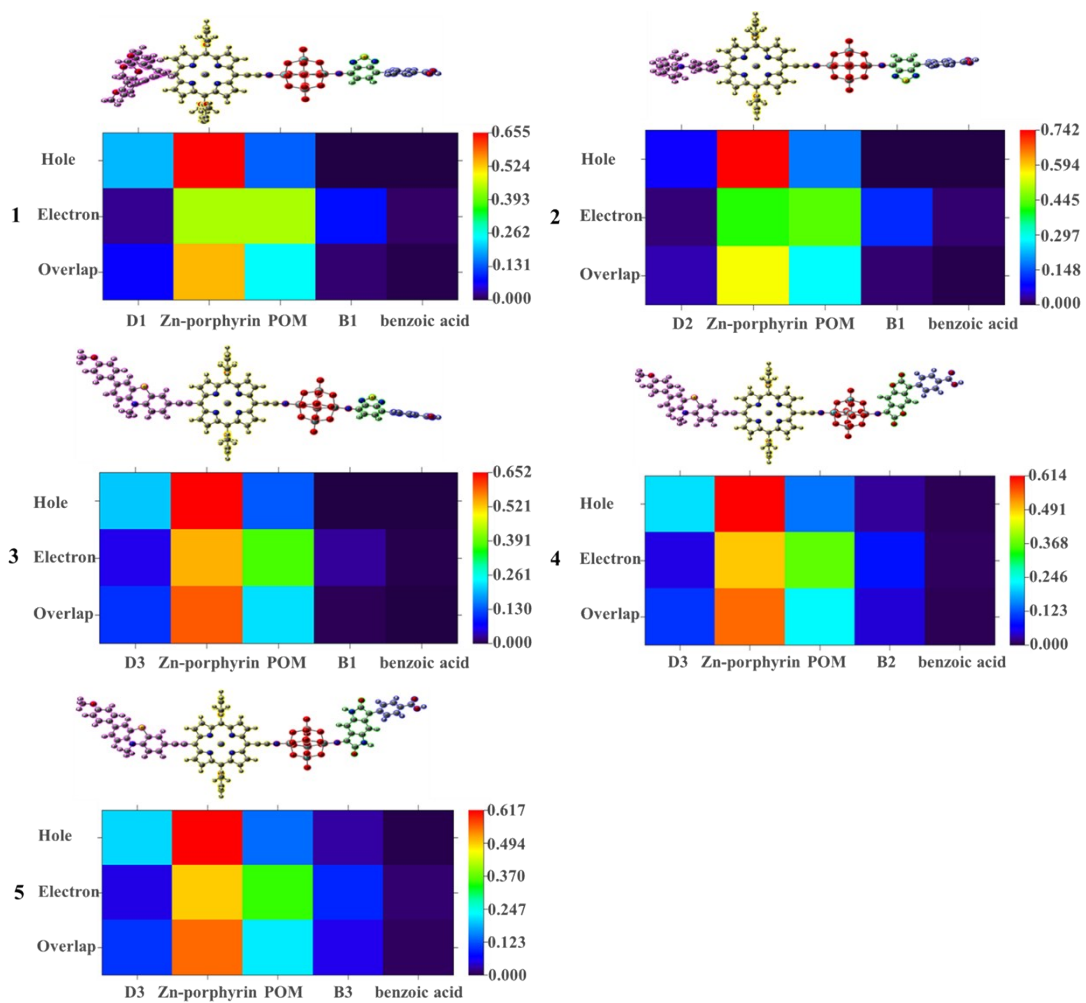

**Figure S2.** The heat maps of dyes 1–5.

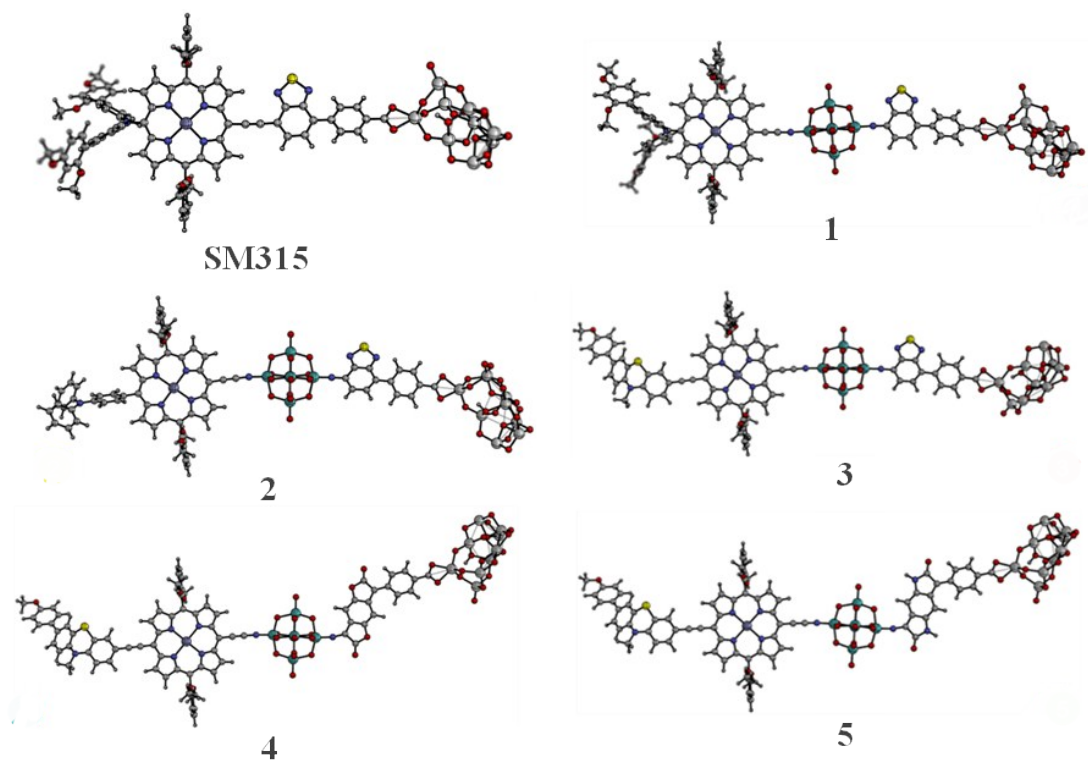

**Figure S3.** Optimized geometrical structure of studied dyes adsorbed onto the  $(\text{TiO}_2)_9$  cluster.

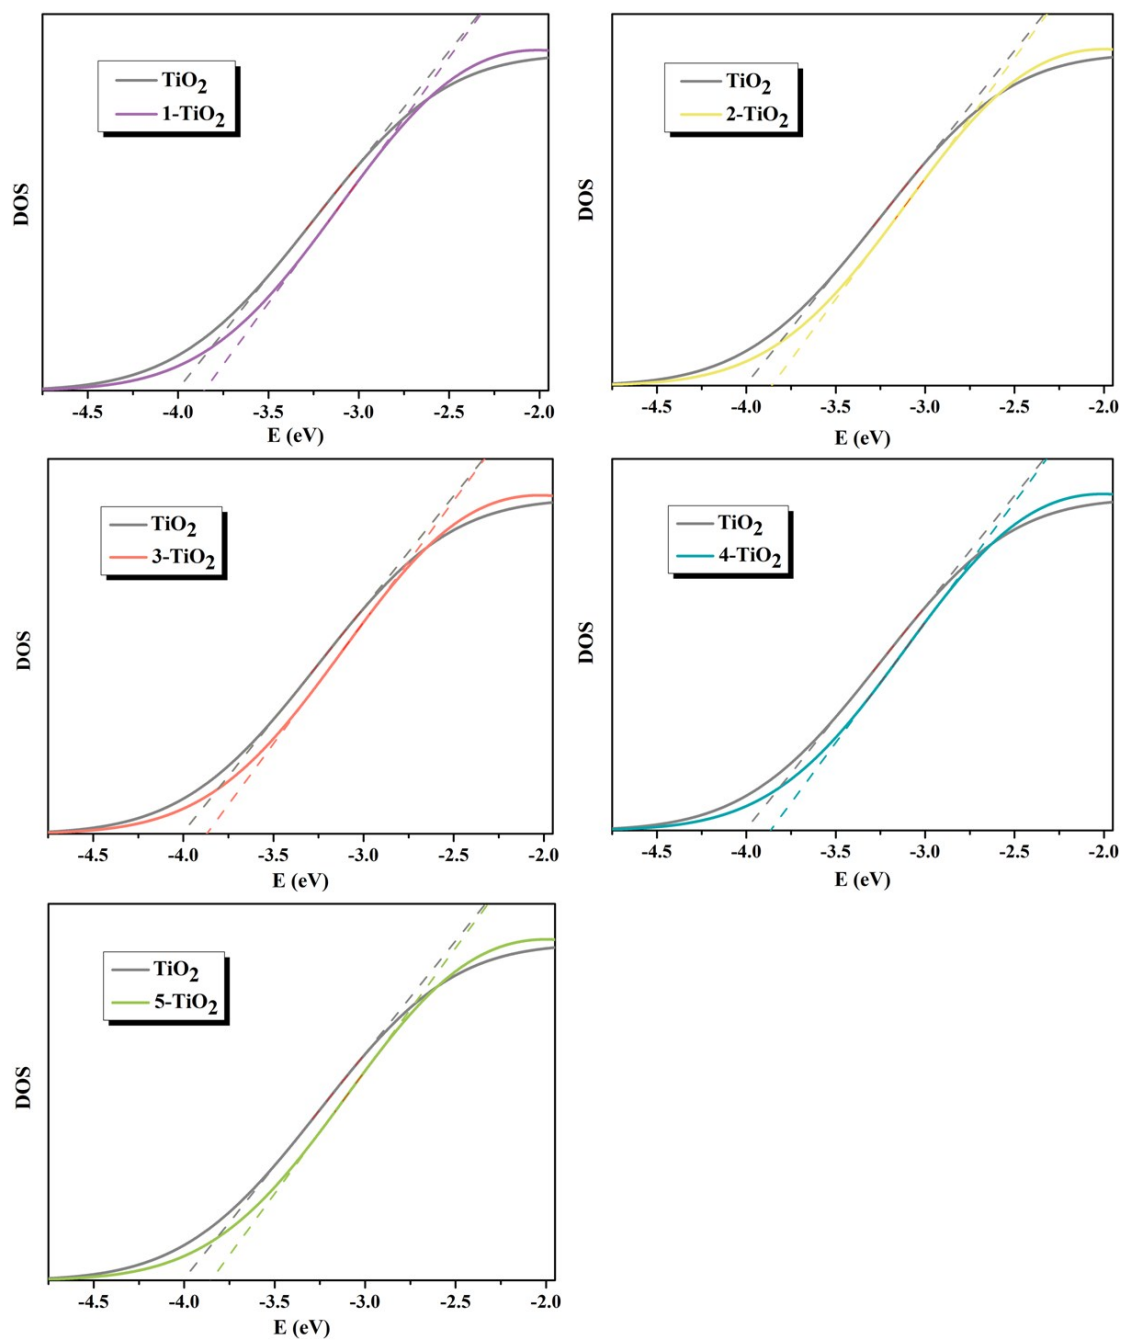

**Figure S4.** Total and partial density of states (DOS) of dyes-(TiO<sub>2</sub>)<sub>9</sub> complexes.

**Table S1.** The experimental and theoretical maximum absorption wavelengths  $\lambda_{\max}$  (nm) and molar absorption coefficient  $\varepsilon$ .

| <b>SM315</b> | $\lambda_{\max}$ | $\varepsilon(10^3 \text{ M}^{-1} \text{ cm}^{-1})$ |
|--------------|------------------|----------------------------------------------------|
| Exp.         | 454              | 117                                                |
|              | 668              | 53                                                 |
| CAM-B3LYP    | 459              | 117                                                |
|              | 626              | 47                                                 |
| M06          | 432              | 139                                                |
|              | 706              | 58                                                 |



**Table S2.** CB shift ( $\Delta E_{\text{CB}}$ , eV), transfer charge ( $n_{\text{CT}}$ ,  $e^-$ ) for dyes absorbed onto  $\text{TiO}_2$  and average electrostatic potential ( $V_{\text{EL}}$ , eV) of studied dyes.

| dye          | $\Delta E_{\text{CB}}$ | $n_{\text{CT}}$ | $V_{\text{EL}}$ |
|--------------|------------------------|-----------------|-----------------|
| <b>SM315</b> | 0.052                  | 0.596           | -0.336          |
| <b>1</b>     | 0.151                  | 0.646           | -0.450          |
| <b>2</b>     | 0.150                  | 0.646           | -0.450          |
| <b>3</b>     | 0.138                  | 0.647           | -0.450          |
| <b>4</b>     | 0.143                  | 0.648           | -0.444          |
| <b>5</b>     | 0.155                  | 0.655           | -0.444          |
